# Supplementary material
Source: Springer Nature journal article supplement (https://www.springermedizin.de/resource/supplementary/12936_2009_971_MOESM1_ESM.pdf/9548668)

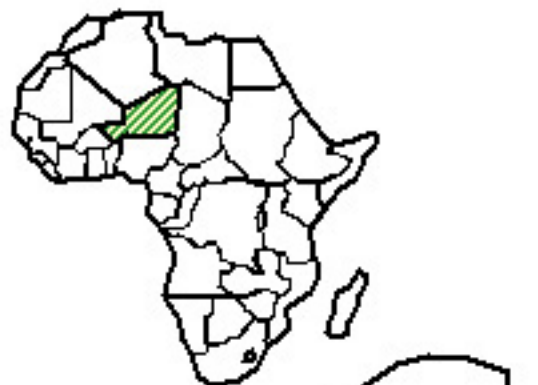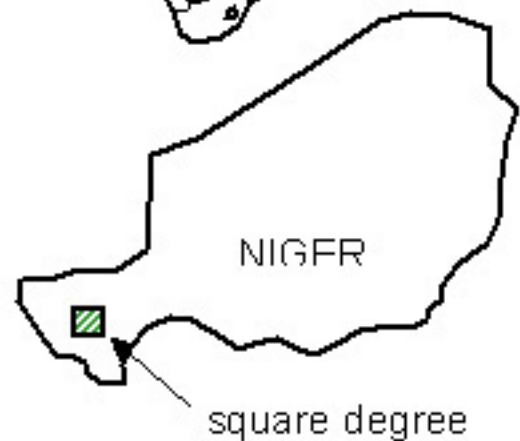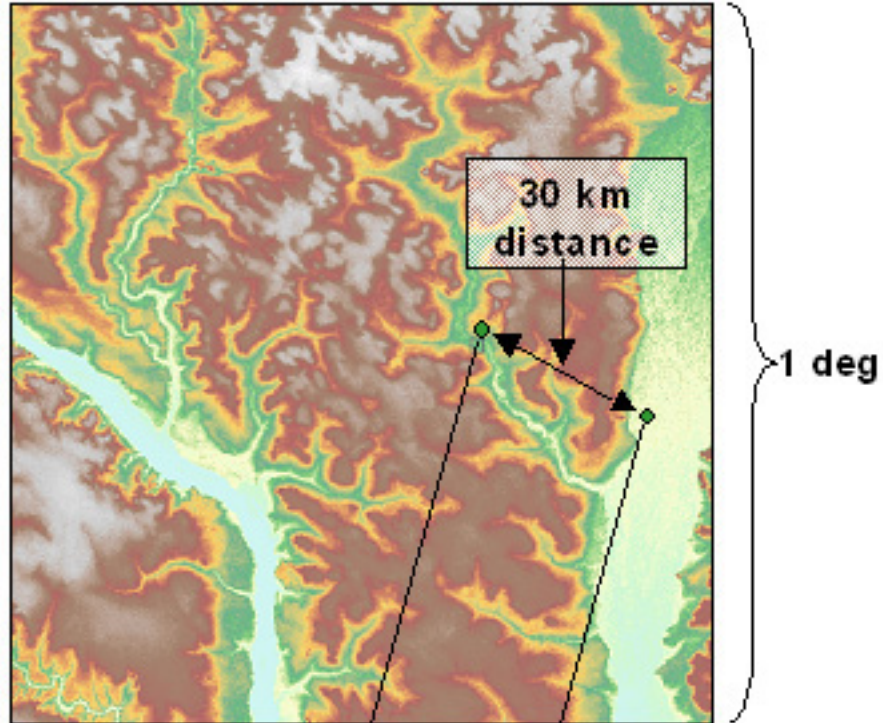

Banizoumbou

Zindarou

Supplement: MOESM1 [file 9548668]
